# Supplementary material for: Exploring a multi-omics study of micronutrients and colon cancer risk
Source: Research Square preprint supplement (doi:10.21203/rs.3.rs-5816587/v1), 2025-01-16
Supplement: Supplementary file 1 [file 2a94c50de04c7d4df58149a4.xlsx]

## Sheet: Sheet1
Exposure	SNP	CHR	BP	EA	OA	Beta	P value	Se
Cu	rs1175550	1	3774964	A	G	-0.2	5.03e-10	0.032
	rs2769264	1	151372265	G	T	0.31	2.63e-20	0.034
	rs10014072	4	113027634	A	G	0.16	1.13e-06	0.034
	rs12153606	5	85287951	G	T	0.16	2.5e-06	0.034
	rs3857536	6	66219155	C	T	0.13	4.08e-06	0.028
	rs12582659	12	75670748	C	T	1.26	2.86e-06	0.27
	rs114415211	1	151466582	A	G	0.47	5.09e-07	0.094
	rs116071814	8	23352269	T	C	0.24	4.6e-06	0.051
	rs2050913	10	91773911	T	C	0.12	2.84e-06	0.025
	rs1175552	1	3771175	A	C	0.15	2.14e-07	0.028
	rs6467617	7	135906335	T	C	0.23	2.25e-06	0.049
	rs17564336	1	151376698	T	G	-0.22	1.79e-17	0.026
	rs34951015	3	149208528	A	G	0.25	9.57e-10	0.04
Fe	rs1800562	6	26092913	A	G	0.27	1e-200	0.008
	rs855791	22	37066896	A	G	-0.17	1e-200	0.005
	rs7385804	7	100638347	C	A	-0.06	9.42e-43	0.004
	rs9399136	6	135081201	C	T	0.06	1.08e-36	0.005
	rs4854760	3	133779897	G	A	0.05	5.67e-33	0.004
	rs35945185	1	65671556	A	G	0.03	1.54e-13	0.004
	rs13007705	2	238160555	T	C	0.03	2.01e-12	0.004
	rs2005682	19	35456759	T	A	-0.03	2.37e-11	0.004
	rs12718598	7	50360747	C	T	0.03	3.69e-11	0.004
	rs2228145	1	154454494	C	A	0.03	8.42e-11	0.004
	rs77262773	17	69253570	T	C	0.08	9.54e-10	0.013
	rs7630745	3	66376605	C	T	0.03	2.09e-09	0.004
	rs57659670	15	45106240	C	T	-0.04	1.08e-08	0.007
	rs1799945	6	26090951	G	C	0.17	1.26e-187	0.006
	rs2844822	6	29868870	C	G	-0.03	5.02e-08	0.006
	rs116019440	6	26061092	A	T	-0.06	5.04e-08	0.011
	rs113130862	6	28617865	G	A	-0.07	5.04e-08	0.014
	rs7251303	19	35231841	A	C	0.02	5.14e-08	0.004
	rs2237227	6	26104667	A	C	-0.05	5.2e-08	0.009
	rs550629667	6	28994615	T	C	0.08	5.22e-08	0.015
	rs9274712	6	32669521	T	C	0.02	5.31e-08	0.004
	rs140850749	6	26891662	G	C	-0.06	5.39e-08	0.011
	rs1265184	6	31183985	A	G	0.08	5.5e-08	0.015
	rs10740134	10	63555673	T	C	-0.02	5.82e-08	0.004
	rs80067878	6	25574997	T	C	0.1	5.99e-08	0.019
	rs760520	22	36851236	G	C	-0.02	6.72e-08	0.004
	rs146700177	22	35826309	C	T	-0.04	6.93e-08	0.007
	rs72836134	6	22218001	G	A	0.08	8.09e-08	0.015
	rs73163080	22	39891930	A	T	-0.05	8.57e-08	0.01
	rs187570181	6	32196810	T	C	-0.05	9.17e-08	0.009
	rs2284009	22	36682504	T	C	-0.03	1.02e-07	0.006
	rs149906368	6	26229080	T	C	-0.08	1.07e-07	0.015
	rs2294915	22	43945024	T	C	0.02	1.08e-07	0.005
	rs5756391	22	36902302	A	G	0.02	1.16e-07	0.004
	rs73161899	22	37264661	A	C	-0.06	1.24e-07	0.011
	rs739936	11	16783679	T	C	-0.03	1.34e-07	0.005
	rs77811187	22	36933594	A	G	-0.07	1.53e-07	0.013
	rs61804209	1	161696843	G	A	0.03	1.67e-07	0.006
	rs12190171	6	25722740	C	T	-0.06	1.75e-07	0.011
	rs483792	6	23964253	A	C	0.02	1.8e-07	0.005
	rs387628	6	24951581	A	G	-0.02	2.04e-07	0.004
	rs116153196	6	28001658	A	G	0.08	2.05e-07	0.015
	rs2158799	7	28237488	C	G	-0.02	2.73e-07	0.004
	rs9260480	6	29952386	C	T	0.04	2.78e-07	0.008
	rs550852967	22	36415265	A	G	-0.09	2.89e-07	0.017
	rs28929474	14	94378610	T	C	0.09	3.66e-07	0.018
	rs12110459	6	36319912	A	T	0.04	3.99e-07	0.008
	rs55709272	2	113109711	C	T	-0.02	4.16e-07	0.004
	rs111265204	6	26638189	A	G	-0.11	4.49e-07	0.022
	rs59755875	22	37215644	G	T	-0.03	4.86e-07	0.006
	rs146139049	22	37788351	A	G	0.06	5.64e-07	0.012
	rs12143966	1	247438055	A	G	-0.02	6.35e-07	0.004
	rs41271815	6	25472509	T	C	-0.04	6.92e-07	0.008
	rs116116350	3	133919454	C	G	-0.11	7.19e-07	0.023
	rs213206	6	33273366	G	C	0.02	8.02e-07	0.004
	rs73181000	12	102467405	A	G	0.05	8.35e-07	0.01
	rs12407066	1	182210827	A	C	-0.02	8.95e-07	0.005
	rs114257178	22	36965961	T	A	-0.04	8.98e-07	0.007
	rs9607414	22	37121657	T	C	-0.02	9.36e-07	0.004
	rs1233397	6	29577938	G	A	-0.02	9.51e-07	0.005
	rs983828	7	128366341	G	A	-0.02	9.56e-07	0.005
	rs140247848	22	38273009	A	G	0.05	9.84e-07	0.01
	rs2042919	19	7899064	G	A	-0.02	1.01e-06	0.005
	rs12705056	7	99233733	T	C	0.03	1.11e-06	0.006
	rs4817984	21	39093140	A	C	0.02	1.19e-06	0.004
	rs1573673	22	37172630	T	C	0.03	1.23e-06	0.007
	rs1223763	1	214160903	T	G	0.02	1.74e-06	0.005
	rs62230766	22	37009630	T	C	-0.03	1.76e-06	0.005
	rs9607411	22	37083824	C	T	0.07	1.76e-06	0.015
	rs7216369	17	12956998	T	C	-0.03	1.88e-06	0.007
	rs4729627	7	100952788	A	C	-0.02	2.08e-06	0.005
	rs2613522	17	78123984	G	A	-0.02	2.09e-06	0.004
	rs74338506	6	111733099	A	G	-0.06	2.14e-06	0.014
	rs141899063	6	31234077	C	T	0.09	2.4e-06	0.019
	rs2043192	2	235297146	G	A	-0.02	2.58e-06	0.004
	rs4064993	8	23523997	T	A	0.02	2.75e-06	0.004
	rs74691901	6	25900665	G	A	-0.1	2.77e-06	0.021
	rs116422639	6	22301367	T	C	0.06	2.82e-06	0.013
	rs10261327	7	21423210	T	C	0.02	2.92e-06	0.004
	rs77943558	14	75772296	T	C	0.08	2.95e-06	0.017
	rs7160863	14	95791439	A	G	0.03	3.11e-06	0.007
	rs201165754	2	23921231	A	C	-0.03	3.12e-06	0.007
	rs114081780	3	62130027	G	A	-0.06	3.15e-06	0.012
	rs4367374	6	22767379	C	A	0.02	3.41e-06	0.005
	rs138682182	22	37908968	A	G	-0.09	3.41e-06	0.02
	rs10159312	1	233019835	T	C	-0.03	3.48e-06	0.006
	rs58658771	15	32709533	A	T	0.02	3.65e-06	0.005
	rs740516	17	69086821	G	C	-0.03	3.94e-06	0.006
	rs77034634	4	54492079	T	C	0.04	4.13e-06	0.008
	rs563076	15	73307469	C	A	0.02	4.16e-06	0.004
	rs61875518	10	58469204	A	G	0.02	4.26e-06	0.005
	rs17019886	2	36820598	G	T	0.05	4.39e-06	0.011
	rs190262259	2	111362779	A	G	0.02	4.4e-06	0.005
	rs140047638	13	71979335	C	T	0.1	4.64e-06	0.022
	rs114165349	1	26695422	C	G	0.07	4.83e-06	0.016
	rs541857570	6	31378983	T	C	0.05	4.94e-06	0.011
Se	rs921943	5	79020653	T	C	0.25	9.4e-28	0.023
	rs4950779	1	202573074	C	T	0.67	3.16e-07	0.132
	rs10023369	4	62930825	A	G	-0.14	4.42e-07	0.029
	rs7700970	5	79115501	C	T	-0.27	7.17e-13	0.037
	rs11779526	8	27053199	A	T	-0.15	1.68e-06	0.032
	rs7163368	15	63278922	C	T	0.16	4e-06	0.034
	rs3785832	17	61461433	C	T	-0.15	1.82e-06	0.031
	rs3770549	2	215995827	T	A	0.19	2.39e-06	0.04
	rs6823178	4	56008076	G	A	0.13	2.32e-06	0.026
	rs921943	5	79020653	T	C	0.26	1.43e-18	0.03
	rs11948804	5	79507955	T	C	0.24	3.9e-07	0.047
	rs2631524	16	55183220	G	A	0.15	1.98e-06	0.032
	rs12951643	17	48504656	G	A	0.23	8.01e-07	0.047
	rs9609603	22	32621883	T	C	-0.12	4e-06	0.027
Beta carotene	rs6564851	16	81230992	G	T	0.15	1.6e-24	0.015
Zn	rs1532423	8	85356084	A	G	0.18	6.4e-12	0.026
	rs2120019	15	75041843	C	T	-0.29	1.55e-18	0.033
	rs4333127	4	5928306	A	G	0.22	3e-06	0.047
	rs11763353	7	15591246	A	G	0.19	6.9e-07	0.039
	rs11232535	11	81217766	C	T	0.33	6.73e-07	0.065
	rs7148590	14	65006478	A	G	-0.14	1.37e-07	0.026
	rs10484100	14	86350752	A	G	0.21	3.3e-06	0.045
Vitamin B12	rs602662	19	48703728	A	G	0.16	2.4e-139	0.006
	rs34324219	11	59855905	C	A	0.21	1.1e-111	0.009
	rs1801222	10	17114152	G	A	0.11	2.3e-42	0.008
	rs2336573	19	8302825	T	C	0.32	8.4e-59	0.02
	rs1131603	22	30622988	C	T	0.17	1.1e-21	0.018
	rs41281112	13	99866380	C	T	0.17	8.9e-35	0.014
	rs1141321	6	49444720	C	T	0.06	3.6e-26	0.006
	rs3742801	14	74292303	T	C	0.05	1.7e-13	0.006
	rs2270655	4	145655266	G	C	0.07	2.2e-13	0.009
	rs12272669	11	71681564	A	G	0.51	3e-09	0.088
	rs62515066	8	80435848	G	A	0.12	5.4e-07	0.024
Vitamin C	rs6693447	1	2398751	T	G	0.04	6.25e-10	0.006
	rs7740812	6	52860989	G	A	0.04	1.88e-09	0.006
	rs13028225	2	219166533	T	C	0.1	2.38e-30	0.009
	rs33972313	5	139379813	C	T	0.36	4.61e-90	0.018
	rs10051765	5	177372991	C	T	0.04	3.64e-09	0.007
	rs174547	11	61803311	C	T	0.04	3.84e-08	0.007
	rs117885456	12	95855333	A	G	0.08	1.7e-11	0.012
	rs2559850	12	101699681	A	G	0.06	6.3e-20	0.006
	rs10136000	14	104787244	A	G	0.04	1.33e-08	0.007
	rs56738967	16	79706644	C	G	0.04	7.62e-10	0.007
	rs9895661	17	61379228	T	C	0.06	1.05e-14	0.008
	rs77962988	2	73658963	T	C	-0.05	9e-08	0.008
	rs73850547	3	104587545	A	G	0.03	2.85e-06	0.007
	rs7640441	3	125399238	A	C	0.04	1.19e-06	0.007
	rs4867910	5	170014156	T	C	-0.03	3.45e-06	0.007
	rs1165189	6	25849551	A	C	-0.04	1.18e-07	0.007
	rs4715312	6	52748683	T	C	0.03	9.07e-07	0.006
	rs868822	7	156460245	T	G	-0.03	3.3e-06	0.007
	rs2941484	8	75566533	T	C	0.03	6.37e-08	0.006
	rs10758628	9	4525855	A	C	0.03	1.28e-06	0.006
Vitamin D	rs10758628	9	4525855	A	C	0.03	1.28e-06	0.006
	rs1011468	7	104973344	A	G	-0.01	1.9e-12	0.002
	rs1047891	2	210675783	A	C	-0.01	1e-09	0.002
	rs10818769	9	122957644	G	C	-0.02	1.6e-09	0.003
	rs10859995	12	95981904	C	T	-0.04	8.9e-81	0.002
	rs11127048	2	27529596	A	G	0.02	3e-21	0.002
	rs111529171	7	21532314	C	G	-0.02	3.1e-10	0.002
	rs112285002	19	47871063	T	C	0.06	2.9e-115	0.003
	rs11264360	1	155314795	A	T	0.02	6.9e-13	0.002
	rs1149605	11	76774172	C	T	0.02	1.1e-13	0.003
	rs117576073	11	14891027	T	G	-0.12	7.2e-38	0.009
	rs12123821	1	152206676	T	C	0.08	2e-58	0.005
	rs1229984	4	99318162	C	T	-0.05	2.5e-13	0.007
	rs12317268	12	21199607	G	A	-0.02	8.4e-12	0.003
	rs12803256	11	71421822	G	A	0.1	1e-200	0.002
	rs145432346	4	71709300	C	T	0.11	1e-200	0.003
	rs17765311	15	63497753	C	A	-0.02	1.6e-14	0.002
	rs1800588	15	58431476	T	C	-0.03	1.4e-35	0.002
	rs1800775	16	56961324	A	C	-0.02	1.7e-17	0.002
	rs1972994	3	85581992	T	A	-0.02	3e-16	0.002
	rs2011425	2	233718962	G	T	-0.05	3.8e-32	0.004
	rs2037511	18	63698973	A	G	0.02	2.9e-09	0.003
	rs2074735	22	31139886	C	G	0.03	2.6e-11	0.004
	rs222026	4	71778043	T	A	-0.05	6.4e-62	0.003
	rs2229742	21	14966851	C	G	-0.03	2e-13	0.003
	rs2847500	11	120243712	A	G	-0.02	9e-14	0.003
	rs2909218	17	68468405	T	C	0.02	3.5e-11	0.003
	rs2934744	1	62582374	A	C	-0.02	1.2e-25	0.002
	rs34726834	8	26032090	T	C	0.01	1.6e-08	0.002
	rs3750296	1	17233161	C	G	-0.02	1e-22	0.002
	rs3814995	19	35851310	T	C	-0.01	7e-11	0.002
	rs3822868	6	131613846	G	A	0.02	8.7e-16	0.003
	rs532436	9	133274414	A	G	-0.02	1.7e-08	0.003
	rs577185477	11	14591017	C	T	-0.38	1e-200	0.01
	rs58073039	4	87366211	G	A	-0.02	6.7e-11	0.002
	rs58542926	19	19268740	T	C	0.03	5.2e-19	0.004
	rs6127099	20	54114863	T	A	-0.03	2.2e-47	0.002
	rs62007299	15	77419377	A	G	-0.01	6.3e-11	0.002
	rs6438900	3	125429443	G	C	0.01	3.6e-10	0.002
	rs6698680	1	2398222	G	A	-0.01	8.8e-09	0.002
	rs6724965	2	100823689	G	A	-0.02	1.2e-08	0.003
	rs71383766	16	30918912	T	C	0.01	2.5e-10	0.002
	rs73015021	19	11082239	G	A	0.02	2.2e-15	0.003
	rs7519574	1	34260951	A	G	0.02	2.2e-09	0.003
	rs7528419	1	109274570	G	A	0.02	2e-16	0.002
	rs7569755	2	117890685	A	G	0.01	7.2e-11	0.002
	rs7650253	3	49393727	A	T	0.02	5.2e-11	0.002
	rs7718395	5	119316879	G	C	0.01	1.2e-08	0.002
	rs77924615	16	20381010	A	G	-0.02	3.2e-09	0.003
	rs7828742	8	115948504	G	A	-0.02	1.2e-28	0.002
	rs78649910	4	3480486	A	T	-0.02	8.4e-09	0.003
	rs8018720	14	39086981	C	G	-0.03	6.5e-33	0.003
	rs804280	8	11755189	A	C	0.01	1.4e-12	0.002
	rs8063706	16	11815695	T	A	0.01	7.5e-09	0.002
	rs8091117	18	31339831	A	C	-0.02	3.4e-09	0.004
	rs867772	1	220799001	G	A	-0.01	1.6e-11	0.002
	rs960596	22	40997516	T	C	0.01	7.5e-09	0.002
	rs964184	11	116778201	C	G	0.04	2.5e-43	0.003
	rs9668081	12	38209109	T	C	0.01	1.3e-08	0.002
	rs10500209	19	11868349	C	T	-0.01	2e-09	0.002
	rs1065853	19	44909976	T	G	0.03	2.3e-15	0.004
	rs10832218	11	14159628	C	T	-0.04	1.5e-29	0.003
	rs10832289	11	14647950	T	A	-0.07	1e-200	0.002
	rs12997242	2	21158305	A	G	-0.01	1e-09	0.002
	rs157595	19	44922203	G	A	-0.02	2.3e-12	0.002
	rs1858889	7	107477002	C	A	0.01	1.6e-09	0.002
	rs261291	15	58387979	C	T	-0.02	3.6e-30	0.002
	rs2762942	20	54172386	A	G	0.05	1.8e-30	0.004
	rs3768013	1	150842935	A	G	-0.01	4.6e-11	0.002
	rs523583	11	66302675	C	A	0.01	2.3e-09	0.002
	rs56044892	1	41364414	T	C	0.01	5.8e-08	0.003
	rs57631352	19	4338176	G	A	-0.01	4.4e-08	0.002
	rs6123359	20	54098167	G	A	0.03	1.8e-21	0.003
	rs7699711	4	69081878	T	C	0.01	1.8e-07	0.002
	rs8103262	19	52562561	C	T	0.01	4e-07	0.002
